# Supplementary material for: Predictors of the Use of Mineralocorticoid Receptor Antagonists in Patients With Left Ventricular Dysfunction Post‐ST‐Segment–Elevation Myocardial Infarction
Source: PubMed Central journal article supplement — J Am Heart Assoc. 2021 Jul 6;10(14):e019167. doi: 10.1161/JAHA.120.019167 (PMC8483484; doi:10.1161/jaha.120.019167), 2021-07-06
Supplement: JAH3-10-e019167-s001.pdf [file JAH3-10-e019167-s001.pdf]

# **SUPPLEMENTAL MATERIAL**

**Table S1. Association between expanded list of variables and MRA prescription at discharge among MRA-eligible STEMI patients.**

|                                                 | <b>Unadjusted OR<br/>(95% CI)</b> | <b>Adjusted* OR<br/>(95% CI)</b> | <b>P value</b>   |
|-------------------------------------------------|-----------------------------------|----------------------------------|------------------|
| <b>LVEF (per 5% decrease)</b>                   | <b>1.53 (1.26-1.87)</b>           | <b>1.52 (1.23-1.88)</b>          | <b>&lt;0.001</b> |
| <b>Calendar year (per year increase)</b>        | <b>1.22 (1.10-1.35)</b>           | <b>1.24 (1.12-1.38)</b>          | <b>&lt;0.001</b> |
| Age, per 10-year decrease                       | 1.14 (0.93-1.40)                  | 1.09 (0.85-1.38)                 | 0.500            |
| Male                                            | 1.23 (0.63-2.39)                  | 1.37 (0.63-2.96)                 | 0.422            |
| Non-anterior location                           | 0.99 (0.52-1.88)                  | 1.17 (0.58-2.38)                 | 0.656            |
| Non-PCI capable hospital                        | 1.36 (0.78-2.37)                  | 1.39 (0.76-2.53)                 | 0.287            |
| Hospital length-of-stay, per day increase       | 1.00 (0.98-1.02)                  | 1.00 (0.98-1.02)                 | 0.940            |
| No ACEI/ARB use within 24 hours of presentation | 1.58 (0.84-2.99)                  | 1.35 (0.64-2.86)                 | 0.437            |
| Diabetes mellitus                               | <b>0.50 (0.29-0.86)</b>           | 0.54 (0.29-1.00)                 | 0.051            |
| Peak creatinine, per 10 µmol/L decrease         | 1.02 (0.97-1.07)                  | 1.05 (0.98-1.12)                 | 0.182            |

\*Multivariable adjustment for other covariates listed in this table.

ACEI: Angiotensin converting enzyme inhibitor, ARB: Angiotensin II receptor blocker, CI: Confidence interval; LVEF: Left ventricular ejection fraction, OR: odds ratio, PCI: Percutaneous coronary intervention.

**Table S2. Association between expanded list of variables and MRA prescription at discharge among MRA-eligible STEMI patients with history of diabetes (n=151).**

|                                                 | <b>Adjusted* OR (95% CI)</b> | <b>P value</b> |
|-------------------------------------------------|------------------------------|----------------|
| <b>LVEF (per 5% decrease)</b>                   | <b>1.43 (1.01-2.02)</b>      | <b>0.046</b>   |
| <b>Calendar year (per year increase)</b>        | <b>1.30 (1.09-1.56)</b>      | <b>0.004</b>   |
| Age, per 10-year decrease                       | 1.13 (0.74-1.73)             | 0.560          |
| Male                                            | 1.60 (0.44-5.90)             | 0.478          |
| Non-anterior location                           | 1.76 (0.64-4.88)             | 0.276          |
| Non-PCI capable hospital                        | 1.86 (0.72-4.82)             | 0.199          |
| Hospital length-of-stay, per day increase       | 1.02 (0.96-1.07)             | 0.565          |
| No ACEI/ARB use within 24 hours of presentation | 0.56 (0.07-4.55)             | 0.590          |
| Peak creatinine, per 10 µmol/L decrease         | 1.03 (0.93-1.14)             | 0.548          |

\*Multivariable adjustment for other covariates listed in this table.

ACEI: Angiotensin converting enzyme inhibitor, ARB: Angiotensin II receptor blocker, CI: Confidence interval; LVEF: Left ventricular ejection fraction, OR: odds ratio, PCI: Percutaneous coronary intervention.
